# Supplementary material for: Refining a Mouse Model of Progressive Supranuclear Palsy Through Inoculation of Human Post-Mortem Brain-Derived Tau
Source: Research Square preprint supplement (doi:10.21203/rs.3.rs-7456824/v1), 2025-09-12
Supplement: Supplementary file 1 [file 9eeb03c569f8e64bc6ba24c2.docx]

**Preparation of Human Brain Extracts:**

**10% w/v brain lysate**

100mg of human brain tissue was homogenized in 1ml PBS in a final concentration of 10% (w/v), containing protease and phosphatase inhibitors in a gentle-MACS Octo Dissociator (Miltenyi BioTec) and stored at -80°C prior to use.

**PBS Soluble tau**

PBS soluble tau was prepared as previously described (1). 50mg of dissected human tissue was homogenized in 500μl of PBS containing protease and phosphatase inhibitors in a gentle-MACS Octo Dissociator (Miltenyi BioTec). After transferring the homogenate to a low protein binding tube, it was centrifuged at 10,000g for 10 minutes at 4°C. The supernatant was collected and stored at -80°C.

**0.1% Sarkosyl-Insoluble tau**

0.1% SI tau was prepared as previously described (2). 1g of human brain tissue was homogenized in 10 volumes (w/v) extraction buffer consisting of 10mM Tris-HCl, 0.8 M NaCl, 10% sucrose and 1 mM EGTA with protease/phosphatase inhibitors for two minutes using the gentle-MACS Octo Dissociator (Miltenyi BioTec). The homogenate was then centrifuged at 20,000 x g for 20 minutes at 4°C. Supernatant (S1) was kept, and low spin pellets were resuspended in the same buffer for centrifugation and supernatant (S2) was pooled with S1. Pellets were discarded and sarkosyl was added to the pooled supernatant to reach 0.1% (w/v) sarkosyl which was rotated for 1 hour at room temperature then centrifuged at 100,000 x g for 60 minutes at 4°C. The supernatant was discarded, and the higher spin pellets were finally resuspended in a small volume of PBS and stored at -80°C.

**1% Sarkosyl-Insoluble tau**

1% SI tau was prepared as previously described(2–7). 2g of human brain tissue was homogenized in 9 volumes (w/v) of extraction buffer consisting of 10 mM Tris-HCl, 0.8 M NaCl, Ph 7.4, 0.1% sarkosyl, 10% sucrose and 1 mM EDTA with protease/phosphatase inhibitors for two minutes using the gentle-MACS Octo Dissociator (Miltenyi BioTec). The homogenate was then centrifuged at 10,000 x g for 10 minutes at 4°C. Supernatant (S1) was kept, and low spin pellets were subjected to two rounds of resuspension in the extraction buffer and centrifugation. Supernatants, S1, S2 and S3 were pooled together. Pellets were discarded and sarkosyl was added to the pooled supernatant to reach 1% (w/v) sarkosyl which was rotated for 1 hour at room temperature then centrifuged at 300,000 x g for 60 minutes at 4°C. Supernatant (S4) was discarded and the pellet was resuspended in PBS followed by sonication for 1 minute at 50 W using the QSonica. The sample was centrifuged at 10,000 x g for 30 minutes at 4°C. The supernatant was kept and stored at -80°C.

**2% Sarkosyl-Insoluble tau**

1% SI tau was prepared as previously described(8). 2g of human brain tissue was homogenized in 10 volumes (w/v) suspension buffer consisting of 10 mM Tris-HCl, 0.8 M NaCl, pH 7.4, 10% sucrose and 1 mM EGTA with protease/phosphatase inhibitors for two minutes using the gentle-MACS Octo Dissociator (Miltenyi BioTec). Sarkosyl was added to the homogenate to reach 2% (w/v) sarkosyl which was incubated for 30 minutes at 37°C, then centrifuged at 20,000 x g for 20 minutes at 4°C. The low spin pellet was discarded and supernatant (S1) was centrifuged at 100,000 x g for 30 minutes at 4°C. Supernatant (S2) was discarded and the pellet was resuspended in same buffer, and centrifuged at 10,000 x g for 15 minutes at 4°C. Supernatant (S3) was kept and diluted in buffer containing 0.05M Tris-HCl, 0.15 M NaCl, pH 7.4, 10% sucrose and 0.2% sarkosyl, and centrifuged at 166,000 x g for 40 minutes at 4°C. Supernatant (S4) was discarded and the pellet was resuspended in PBS and stored at -80°C.

**References for supplemental material**

1. Martinez-Valbuena I, Lee S, Santamaria E, Fernandez Irigoyen J, Li J, Tanaka H, et al. 4R-Tau seeding activity unravels molecular subtypes in patients with Progressive Supranuclear Palsy 2 3 4. Available from: https://doi.org/10.1101/2023.09.28.559953

2. Ferrer I, García MA, Carmona M, Andrés-Benito P, Torrejón-Escribano B, Garcia-Esparcia P, et al. Involvement of oligodendrocytes in tau seeding and spreading in tauopathies. Front Aging Neurosci. 2019;11(MAY).

3. Clavaguera F, Akatsu H, Fraser G, Crowther RA, Frank S, Hench J, et al. Brain homogenates from human tauopathies induce tau inclusions in mouse brain. Proc Natl Acad Sci U S A. 2013 Jun 4;110(23):9535–40.

4. He Z, McBride JD, Xu H, Changolkar L, Kim S jung, Zhang B, et al. Transmission of tauopathy strains is independent of their isoform composition. Nat Commun. 2020 Dec 1;11(1).

5. Narasimhan S, Guo JL, Changolkar L, Stieber A, McBride JD, Silva L V., et al. Pathological tau strains from human brains recapitulate the diversity of tauopathies in nontransgenic mouse brain. Journal of Neuroscience. 2017 Nov 22;37(47):11406–23.

6. Xu H, O’reilly M, Gibbons GS, Lakshmi Changolkar ·, Mcbride JD, Riddle DM, et al. In vitro amplification of pathogenic tau conserves disease-specific bioactive characteristics. Acta Neuropathol [Internet]. 2021;141:193–215. Available from: https://doi.org/10.1007/s00401-020-02253-4

7. Narasimhan S, Changolkar L, Riddle DM, Kats A, Stieber A, Weitzman SA, et al. Human tau pathology transmits glial tau aggregates in the absence of neuronal tau. Journal of Experimental Medicine. 2020 Feb 3;217(2).

8. Shi Y, Zhang W, Yang Y, Murzin AG, Falcon B, Kotecha A, et al. Structure-based classification of tauopathies. Nature. 2021 Oct 14;598(7880):359–63.
